# Supplementary material for: A first-principles study of interfacial vacancies in the β-CsPbI3/1T-MoS2 heterostructure towards photocatalytic applications
Source: Royal Society of Chemistry journal article supplement (doi:10.1039/d5cp00048c), 2025-01-01
Supplement: d5cp00048c1.pdf [file d5cp00048c1.pdf]

# Electronic Supplementary Information – First-principles study of interfacial vacancies in $\beta$ -CsPbI<sub>3</sub>/1T-MoS<sub>2</sub> heterostructure towards photocatalytic applications

Chol-Hyok Ri<sup>a,c</sup>, Se-Hun Pak<sup>a</sup>, Song-Il O<sup>a</sup>, Chol-Su Jang<sup>a</sup>, Yu-Song Kim<sup>b</sup>,  
Jin-Song Kim<sup>c</sup> and Chol-Jun Yu<sup>c\*</sup>

<sup>a</sup>Faculty of Physics, O Jung Hup Chongjin University of Education, Chongjin, North Hamgyong Province,  
Democratic People's Republic of Korea

<sup>b</sup>Mathematics Department, Chongjin University of Mining and Metallurgical Engineering, Chongjin,  
North Hamgyong Province, Democratic People's Republic of Korea

<sup>c</sup>Chair of Computational Materials Design, Faculty of Materials Science, **Kim Il Sung** University, Ryongnam-Dong,  
Taesong District, Pyongyang, PO Box 76, Democratic People's Republic of Korea

Table S1. The lattice constants of  $\beta$ -CsPbI<sub>3</sub> and 1T-MoS<sub>2</sub> calculated with various exchange-correlation functionals (unit: Å).

| Systems                     | Space group                    | This work    |              |              |              | Previous work                          |                           |
|-----------------------------|--------------------------------|--------------|--------------|--------------|--------------|----------------------------------------|---------------------------|
|                             |                                | PBE          | PBEsol       | PBE+XDM      | vdW-DF-ob86  | DFT cal.                               | Exp.                      |
| $\beta$ -CsPbI <sub>3</sub> | <i>P4/mbm</i>                  | 8.806, 6.463 | 8.599, 6.343 | 8.492, 6.325 | 8.625, 6.390 | 8.447, 6.273 <sup>a</sup>              | 8.826, 6.290 <sup>b</sup> |
| 1T-MoS <sub>2</sub>         | <i>P<math>\bar{3}m1</math></i> | 3.208, 6.929 | 3.227, 5.875 | 3.203, 5.836 | 3.190, 5.711 | 3.18 <sup>c</sup><br>3.19 <sup>d</sup> | 3.23, 5.99 <sup>e</sup>   |

<sup>a</sup> Calculated with HSE06 functional [1]

<sup>b</sup> Ref. [2]

<sup>c</sup> Calculated with GGA-PBE functional [3]

<sup>d</sup> Calculated with HSE06 functional [4]

<sup>e</sup> Ref. [5]

\*Corresponding author: Chol-Jun Yu, Email: cj.yu@ryongnamsan.edu.kp

Table S2. Total energies calculated for CsI/MoS<sub>2</sub> and PbI<sub>2</sub>/MoS<sub>2</sub> heterostructures with all possible interfacial vacancies.

| Interface Systems                  | Cs vacancy |                    | Pb vacancy |                    | I vacancy |                    | S vacancy |                    |
|------------------------------------|------------|--------------------|------------|--------------------|-----------|--------------------|-----------|--------------------|
|                                    | Number     | Energy (eV)        | Number     | Energy (eV)        | Number    | Energy (eV)        | Number    | Energy (eV)        |
| CsI/MoS <sub>2</sub>               | 1          | -23810.8608        | -          | -                  | 1         | -23590.5371        | 1         | -23625.2869        |
|                                    | <b>2</b>   | <b>-23810.8784</b> | -          | -                  | 2         | -23590.5063        | 2         | -23625.5660        |
|                                    | 3          | -23810.8543        | -          | -                  | <b>3</b>  | <b>-23590.5738</b> | 3         | -23625.1397        |
|                                    | 4          | -23810.8165        | -          | -                  | 4         | -23590.5136        | 4         | -23625.5653        |
|                                    |            |                    |            |                    |           |                    | 5         | -23625.6172        |
|                                    |            |                    |            |                    |           |                    | 6         | -23624.9196        |
|                                    |            |                    |            |                    |           |                    | 7         | -23625.4481        |
|                                    |            |                    |            |                    |           |                    | 8         | -23624.9829        |
|                                    |            |                    |            |                    |           |                    | 9         | -23625.2995        |
|                                    |            |                    |            |                    |           |                    | <b>10</b> | <b>-23625.6983</b> |
|                                    |            |                    |            |                    |           |                    | 11        | -23625.4272        |
|                                    |            |                    |            |                    |           |                    | 12        | -23625.0811        |
|                                    |            |                    |            |                    |           |                    | 13        | -23625.3628        |
|                                    |            |                    |            |                    |           |                    | 14        | -23625.6806        |
|                                    |            |                    |            |                    |           |                    | 15        | -23625.5701        |
|                                    |            |                    |            |                    |           |                    | 16        | -23625.3124        |
|                                    |            |                    |            |                    |           |                    | 17        | -23625.6792        |
| PbI <sub>2</sub> /MoS <sub>2</sub> | -          | -                  | 1          | -25085.9734        | 1         | -24872.5075        | 1         | -24907.0809        |
|                                    | -          | -                  | 2          | -25085.8119        | 2         | -24872.4364        | 2         | -24907.4264        |
|                                    | -          | -                  | <b>3</b>   | <b>-25086.4856</b> | <b>3</b>  | <b>-24873.1253</b> | 3         | -24906.7423        |
|                                    | -          | -                  | 4          | -25085.9657        | 4         | -24872.3062        | 4         | -24906.6897        |
|                                    |            |                    |            |                    | 5         | -24872.4825        | 5         | -24907.4099        |
|                                    |            |                    |            |                    | 6         | -24872.5717        | 6         | -24906.4367        |
|                                    |            |                    |            |                    | 7         | -24872.6004        | 7         | -24907.1396        |
|                                    |            |                    |            |                    | 8         | -24872.5717        | 8         | -24907.5173        |
|                                    |            |                    |            |                    |           |                    | 9         | -24907.3191        |
|                                    |            |                    |            |                    |           |                    | 10        | -24906.6443        |
|                                    |            |                    |            |                    |           |                    | 11        | -24907.7578        |
|                                    |            |                    |            |                    |           |                    | 12        | -24908.5292        |
|                                    |            |                    |            |                    |           |                    | 13        | -24907.0801        |
|                                    |            |                    |            |                    |           |                    | 14        | -24907.1407        |
|                                    |            |                    |            |                    |           |                    | <b>15</b> | <b>-24907.9077</b> |
|                                    |            |                    |            |                    |           |                    | 16        | -24906.9137        |
|                                    |            |                    |            |                    |           |                    | 17        | -24908.2532        |

Table S3. The Fermi level  $E_F^s$ , valence band maximum level  $E_{VB}$ , conduction band minimum level  $E_{CB}$ , electrostatic potential bottom at the middle layer  $V_{bot}$  and Fermi energy correction  $\Delta V_F$  for MoS<sub>2</sub> and CsPbI<sub>3</sub> surfaces with CsI and PbI<sub>2</sub> terminations (unit: eV).

| Surface          | $E_F^s$ | $E_{VB}$ | $E_{CB}$ | $V_{bot}$ | $\Delta V_F$ |
|------------------|---------|----------|----------|-----------|--------------|
| MoS <sub>2</sub> | -3.94   |          |          | -13.36    | -9.42        |
| CsI              | -2.75   | -3.55    | -1.98    | -3.79     | -1.04        |
| PbI <sub>2</sub> | -2.75   | -3.55    | -1.98    | -9.15     | -6.40        |

Table S4. The calculated Fermi level of interface  $E_F$ , vacuum level  $\phi_{vac}$ , and electrostatic potential bottom at the middle layer  $V_{bot}$  and Fermi level  $E_F^i$  for MoS<sub>2</sub> and CsPbI<sub>3</sub> sides in the interface systems (unit: eV).

| Interface                          |          | $E_F$ | $\phi_{vac}$ | $V_{bot,MoS_2}$ | $V_{bot,CsPbI_3}$ | $E_{F,MoS_2}^i$ | $E_{F,CsPbI_3}^i$ |
|------------------------------------|----------|-------|--------------|-----------------|-------------------|-----------------|-------------------|
| CsI/MoS <sub>2</sub>               | pristine | -4.01 | 0.47         | -12.16          | -3.66             | -2.74           | -2.62             |
|                                    | $V_{Cs}$ | -4.05 | 0.45         | -12.11          | -3.61             | -2.69           | -2.57             |
|                                    | $V_I$    | -3.69 | 0.74         | -11.84          | -3.94             | -2.42           | -2.90             |
|                                    | $V_S$    | -4.02 | 0.74         | -12.12          | -3.66             | -2.70           | -2.62             |
| PbI <sub>2</sub> /MoS <sub>2</sub> | pristine | -3.50 | 0.87         | -11.85          | -8.64             | -2.43           | -2.24             |
|                                    | $V_{Pb}$ | -4.64 | 0.01         | -12.71          | -8.04             | -3.29           | -1.64             |
|                                    | $V_I$    | -4.44 | 0.15         | -12.50          | -8.37             | -3.08           | -1.97             |
|                                    | $V_S$    | -4.49 | 0.04         | -12.65          | -8.38             | -3.23           | -1.98             |

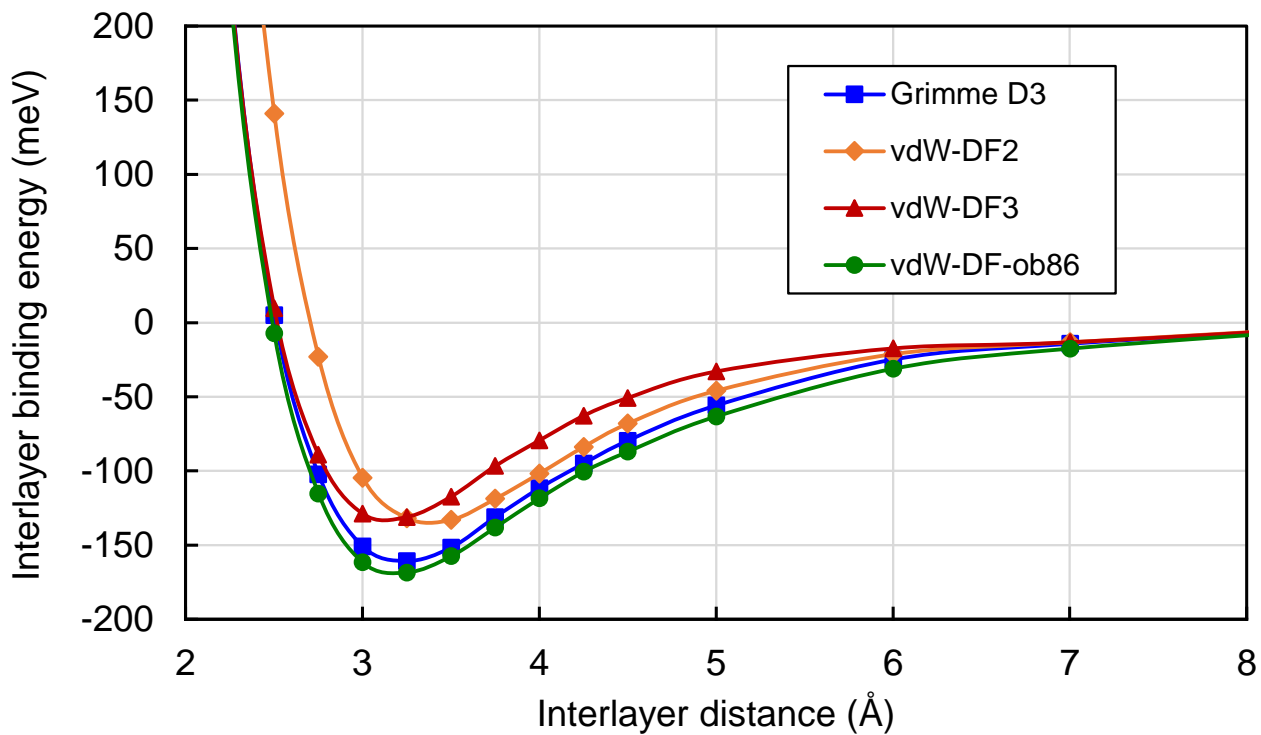

Fig. S1 Interlayer binding energy per atom as a function of interlayer distance for pristine  $\text{PbI}_2/\text{MoS}_2$  interface, calculated using different XC functionals with different dispersion corrections, including the Grimmes's D3, vdW-DF2 and vdW-DF3.

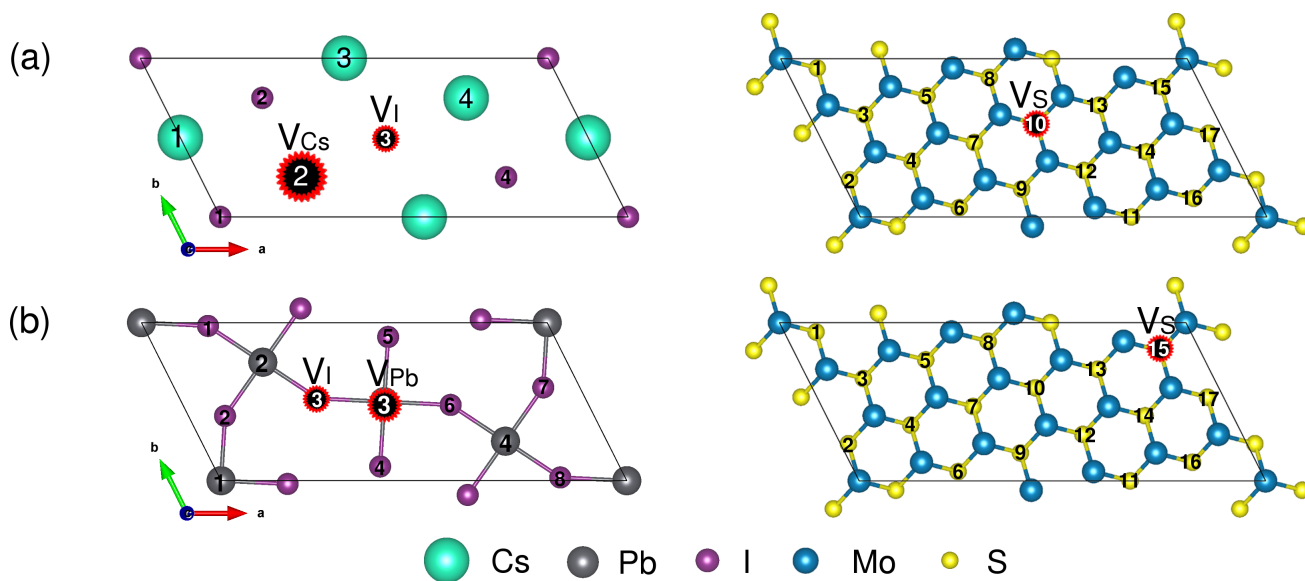

Fig. S2 All vacancy sites included in the calculation for  $\text{CsI}/\text{MoS}_2$  (a) and  $\text{PbI}_2/\text{MoS}_2$  (b) heterostructures. The circles filled with black with red borders represent vacancy sites with the minimum energy.

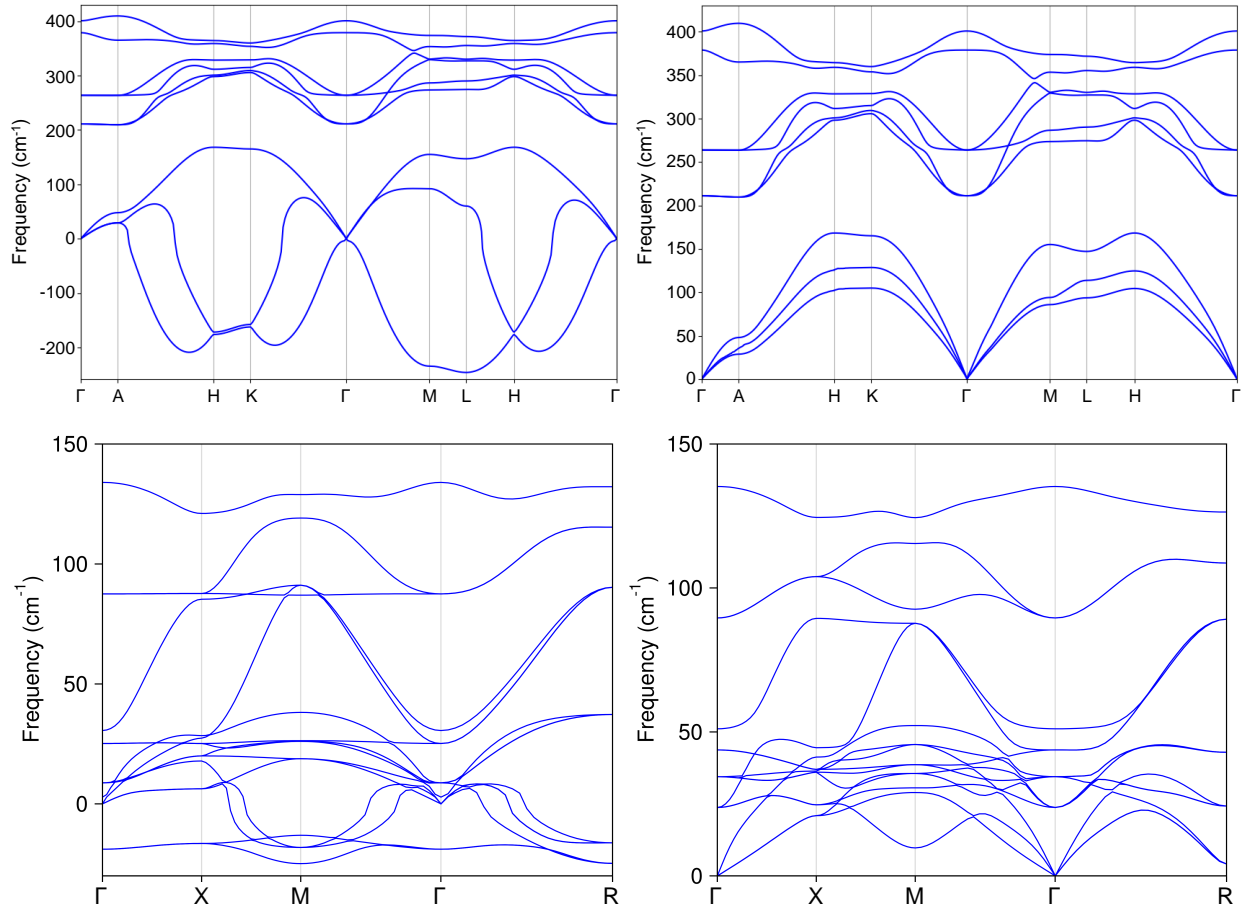

Fig. S3 Phonon dispersion curves of bulk 1T-MoS<sub>2</sub> (top panel) and β-CsPbI<sub>3</sub> (bottom panel). For both bulks, the phonon dispersion curves calculated at 0 K (left panel) contain the soft-mode with imaginary frequency, but those calculated at room temperature using the self-consistent phonon approach [6] (right panel) do not contain any soft-modes, indicating their thermodynamic stabilities.

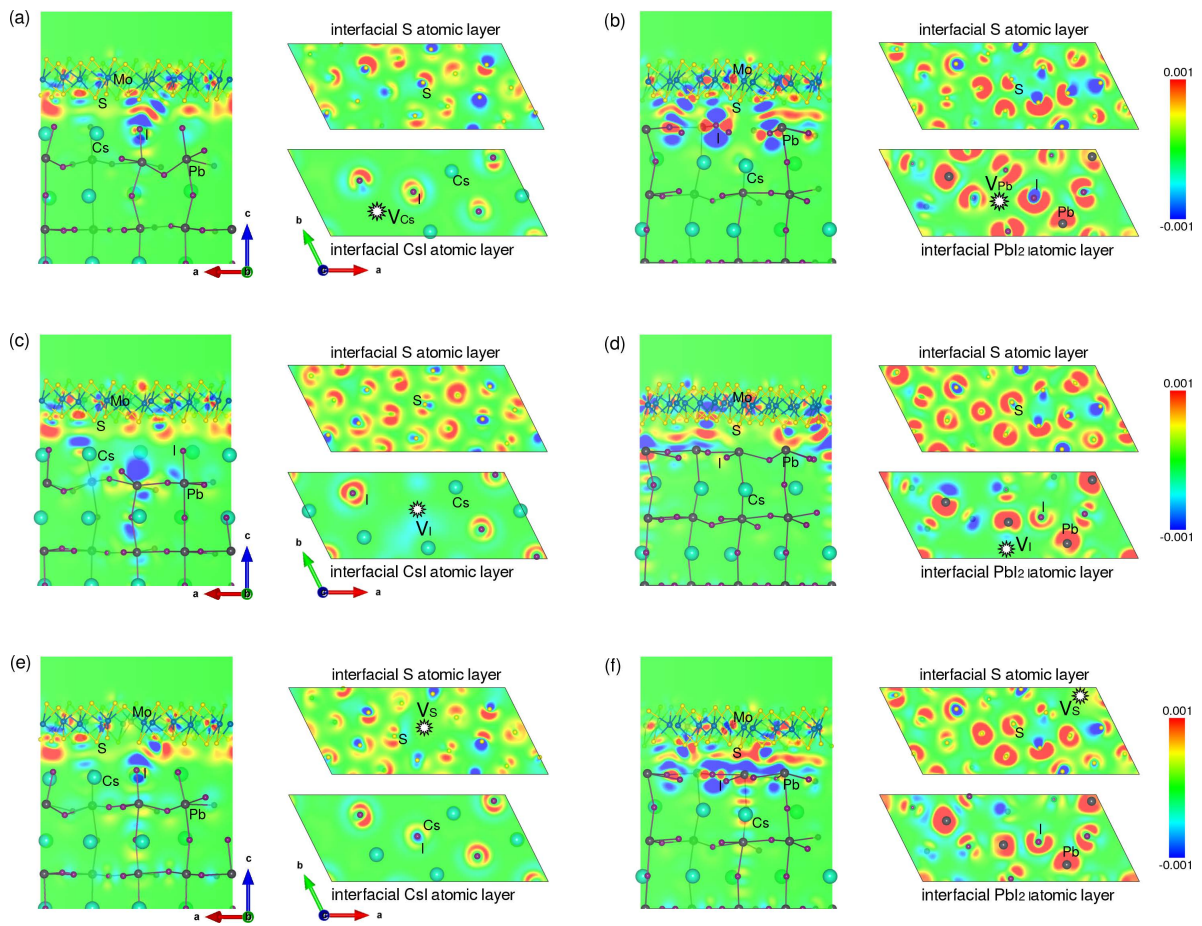

Fig. S4 Isosurface view of electron density difference at the value of  $0.001 |e|/\text{\AA}^3$  upon formation of  $\text{CsI}/\text{MoS}_2$  and  $\text{PbI}_2/\text{MoS}_2$  interfaces. Red (blue) colour represents the electron accumulation (depletion).

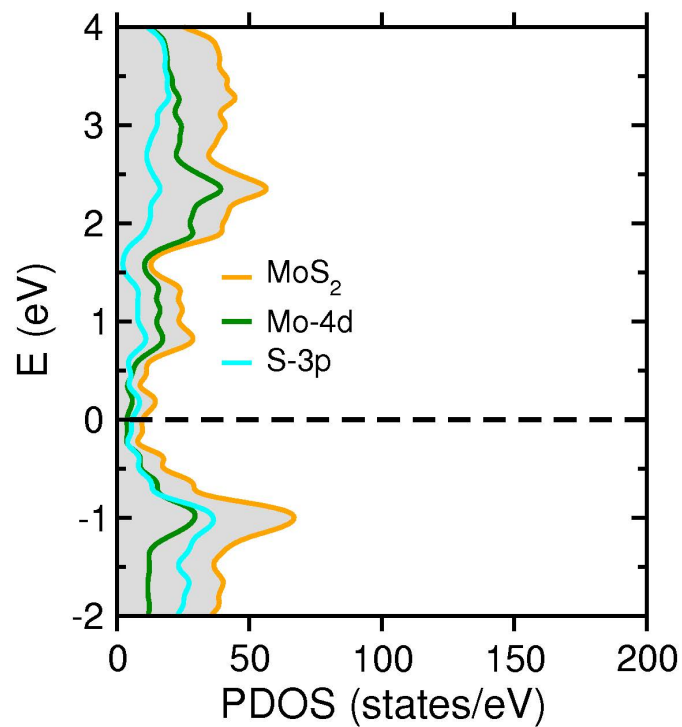

Fig. S5 PDOS of pristine 1T- $\text{MoS}_2$  monolayer. Dash line indicates Fermi energy level.

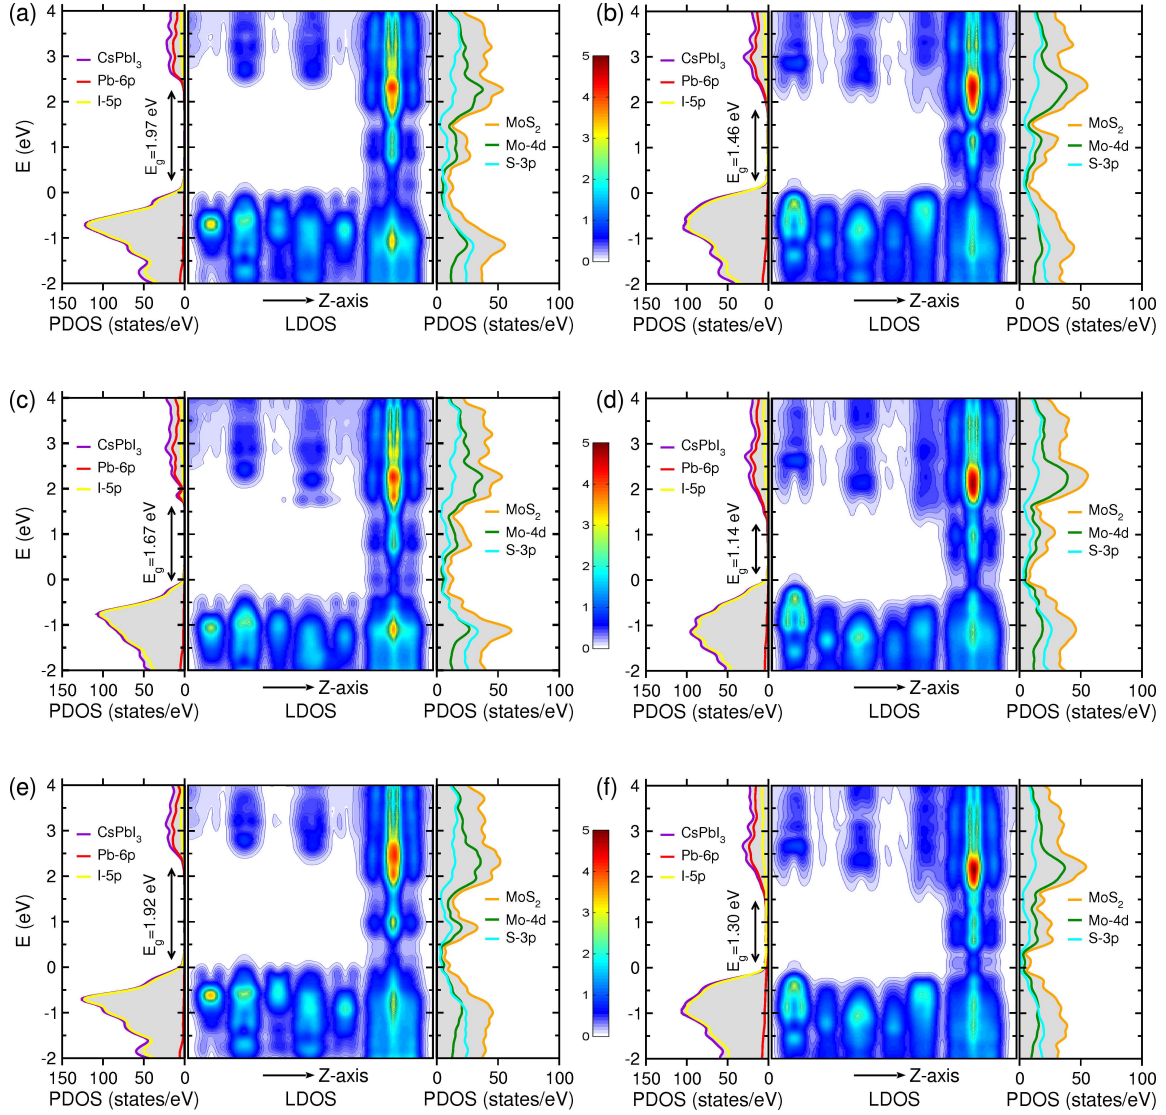

Fig. S6 PDOS from CsPbI<sub>3</sub> (left panel) and MoS<sub>2</sub> (right panel) parts and isoline plot of LDOS for defective CsI/MoS<sub>2</sub> (left column) and PbI<sub>2</sub>/MoS<sub>2</sub> interfaces (right column) with a vacancy like (a) V<sub>Cs</sub>, (b) V<sub>Pb</sub>, (c, d) V<sub>I</sub> and (e, f) V<sub>S</sub>.

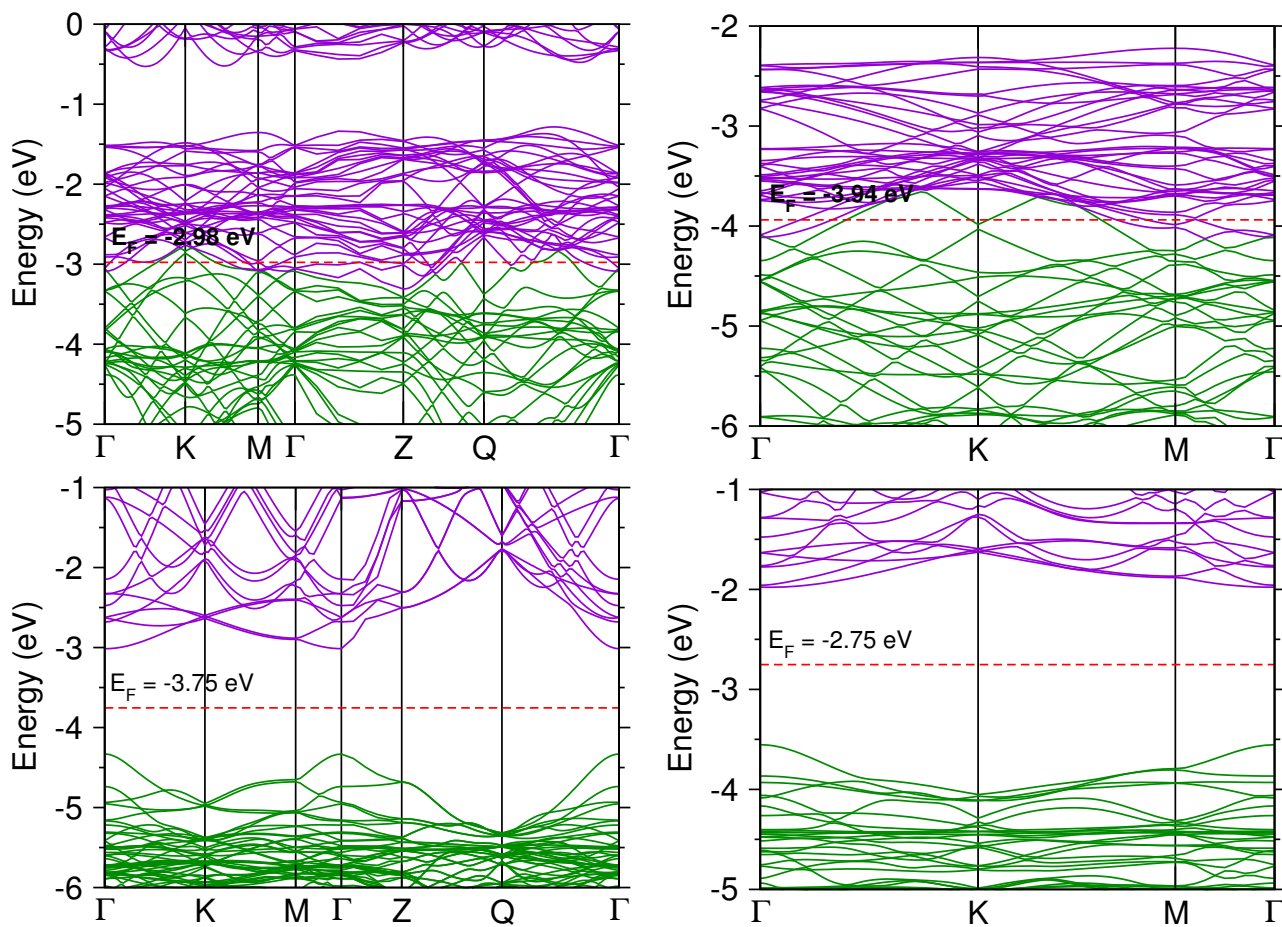

Fig. S7 Electronic band structures of 1T-MoS<sub>2</sub> (top panel) and  $\beta$ -CsPbI<sub>3</sub> in bulk (left panel) and surface (right panel) phases. Green and violet colours represent the occupied and empty bands, respectively. The Fermi level  $E_F$  is denoted by red-coloured dotted line.



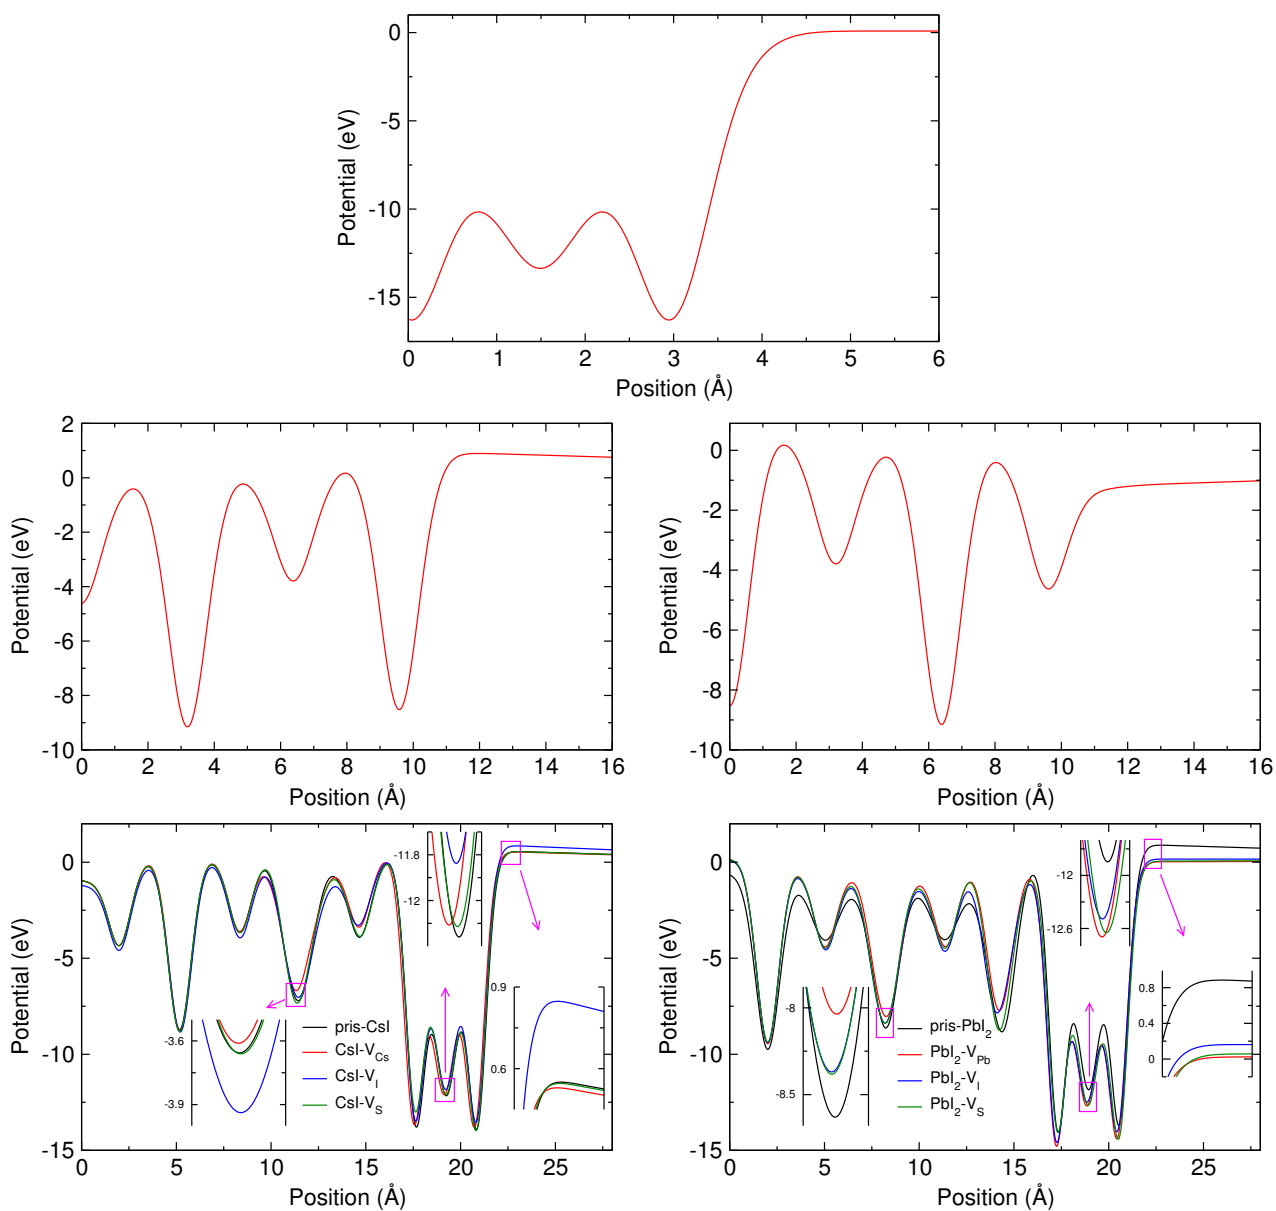

Fig. S8 Electrostatic potential in 1T-MoS<sub>2</sub> surface (top panel),  $\beta$ -CsPbI<sub>3</sub> surface (middle panel) with CsI (left) and PbI<sub>2</sub> (right) terminations, and interface systems (bottom panel) of CsI/MoS<sub>2</sub> (left) and PbI<sub>2</sub>/MoS<sub>2</sub> with interfacial vacancy defects.



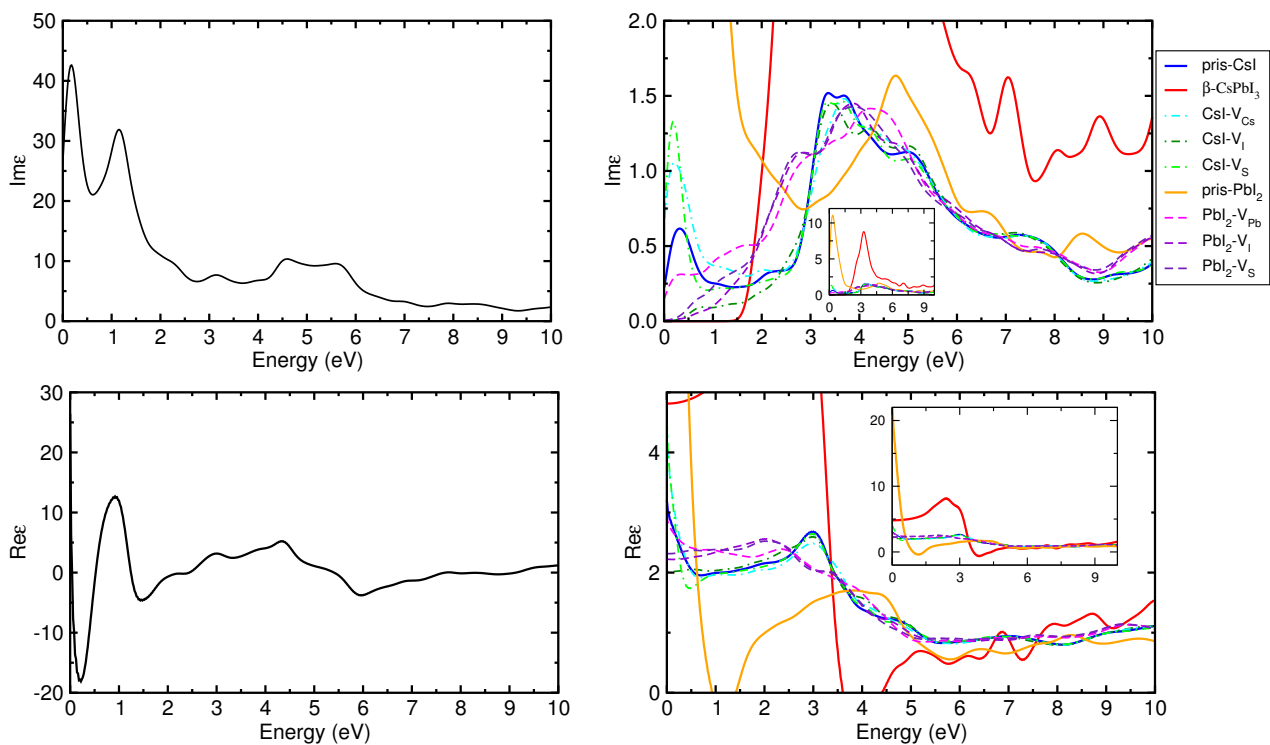

Fig. S9 Imaginary (top panel) and real (bottom panel) parts of the frequency-dependent dielectric functions for 1T-MoS<sub>2</sub> bulk (left panel) and other systems (right panel), such as β-CsPbI<sub>3</sub> bulk and the interface systems.

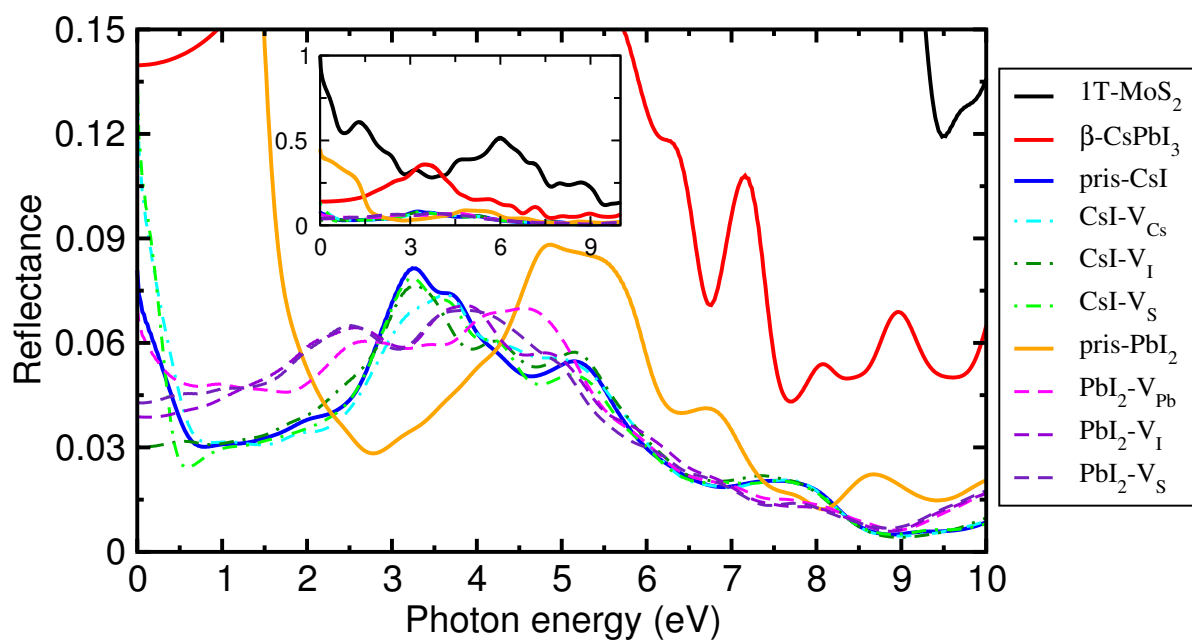

Fig. S10 Reflectance of bulks such as the 1T-MoS<sub>2</sub> and β-CsPbI<sub>3</sub> bulk and their interface systems.

## References

- [1] A. Marronnier, G. Roma, S. Boyer-Richard, L. Pedesseau, J.-M. Jancu, Y. Bonnassieux, C. Katan, C. C. Stoumpos, M. G. Kanatzidis and J. Even, Anharmonicity and disorder in the black phases of cesium lead iodide used for stable inorganic perovskite solar cells, *ACS Nano* **2018**, *12*, 3477–3486.
- [2] Y. Wang, M. I. Dar, L. K. Ono, T. Zhang, M. Kan, Y. Li, L. Zhang, X. Wang, Y. Yang, X. Gao, Y. Qi, M. Grätzel and Y. Zhao, Thermodynamically stabilized  $\beta$ -CsPbI<sub>3</sub>-based perovskite solar cells with efficiencies > 18%, *Science* **2019**, *365*, 591.
- [3] T. Zhang, H. Zhu, C. Guo, S. Cao, C.-M. Lawrence, Z. Wang and X. Lu, Theoretical investigation on the hydrogen evolution reaction mechanism at MoS<sub>2</sub> heterostructures: The essential role of the 1T/2H phase interface, *Catal. Sci. Technol.* **2020**, *10*, 458–465.
- [4] H. Eidsvåg, M. Rasukkannu, D. Velauthapillaia and P. Vajeeston, In-depth first-principles study on novel MoS<sub>2</sub> polymorphs, *RSC Adv.* **2021**, *11*, 3759.
- [5] F. Wypych and R. Schollhorn, 1T-MoS<sub>2</sub>, a new metallic modification of molybdenum disulfide, *J. Chem. Soc. Chem. Commun.* **1992**, *19*, 1386–1388.
- [6] T. Tadano and S. Tsuneyuki, Quartic anharmonicity of rattlers and its effect on lattice thermal conductivity of clathrates from first principles, *Phys. Rev. Lett.* **2018**, *120*, 105901.
